# Using force data to self-pace an instrumented treadmill and measure self-selected walking speed

Seungmoon Song\*, HoJung Choi, and Steven H. Collins

*Mechanical Engineering, Stanford University, Stanford, CA, 94305, United States*

---

## Abstract

*Background:* Self-selected speed is an important functional index of walking. A self-pacing controller that reliably matches walking speed without additional hardware can be useful for measuring self-selected speed in a treadmill-based laboratory.

*Methods:* We adapted a previously proposed self-pacing controller for force-instrumented treadmills and validated its use for measuring self-selected speeds. We first evaluated the controller's estimation of subject speed and position from the force-plates by comparing it to those from motion capture data. We then compared five tests of self-selected speed. Ten healthy adults completed a standard 10-meter walk test, a 150-meter walk test, a commonly used manual treadmill speed selection test, a two-minute self-paced treadmill test, and a 150-meter self-paced treadmill test. In each case, subjects were instructed to walk at or select their comfortable speed. We also assessed the time taken for a trial and a survey on comfort and ease of choosing a speed in all the tests.

*Results:* The self-pacing algorithm estimated subject speed and position accurately, with root mean square differences compared to motion capture of  $0.023 \text{ m s}^{-1}$  and  $0.014 \text{ m}$ , respectively. Self-selected speeds from both self-paced treadmill tests correlated well with those from the 10-meter walk test ( $R > 0.93$ ,  $p < 1 \times 10^{-13}$ ). Subjects walked slower on average in the self-paced treadmill tests ( $1.23 \pm 0.27 \text{ m s}^{-1}$ ) than in the 10-meter walk test ( $1.32 \pm 0.18 \text{ m s}^{-1}$ ) but the speed differences within subjects were consistent. These correlations and walking speeds are comparable to those from the manual treadmill speed selection test ( $R = 0.89$ ,  $p = 3 \times 10^{-11}$ ;  $1.18 \pm 0.24 \text{ m s}^{-1}$ ). Comfort and ease of speed selection were similar in the self-paced tests and the manual speed selection test, but the self-paced tests required only about a third of the time to complete. Our results demonstrate that these self-paced treadmill tests can be a strong alternative to the commonly used manual treadmill speed selection test.

*Conclusions:* The self-paced force-instrumented treadmill well adapts to subject walking speed and reliably measures self-selected walking speeds. We provide the self-pacing software to facilitate use by gait researchers and clinicians.

*Keywords:* self-paced treadmill, self-selected walking speed, force-instrumented treadmill

---

## 1 Background

2 Self-selected walking speed is one of the main performance indices of walking. It is the speed at  
3 which people normally choose to walk and is also known as preferred speed or comfortable speed.  
4 Walking speed determines the time required in achieving the primary goal of walking: getting to a  
5 destination. Healthy adults normally choose to walk at about  $1.3 \text{ m s}^{-1}$  although they can walk much  
6 faster ( $> 2.0 \text{ m s}^{-1}$ ) [1]. Normal walking speed likely results from balancing many factors, including  
7 energy use, time spent in transit, appearance, and comfort. It has often been observed that self-selected  
8 walking speed is close to the speed that minimizes metabolic energy consumption [2, 3] or muscle fatigue  
9 [4] in traveling a unit distance. Self-selected walking speed also has been emphasized as a promising

10 measure to assess physical health. For example, walking speed is a good predictor of health status and  
11 survival rate in older adults [5, 6] and a useful measure for rehabilitation progress [7].

12 There are different ways to measure self-selected walking speeds. A standard method commonly  
13 used in physical therapy and gait studies is the so-called 10-meter walk test [8, 9]. In a 10-meter walk  
14 test, subjects are instructed to walk at their comfortable speed across a 15 ~ 20 m walkway, and the  
15 time taken to traverse the middle 10 m section is measured with a stopwatch to calculate self-selected  
16 walking speed. This process is often conducted multiple times then averaged for reliable measurements.  
17 Another common way of measuring self-selected speed is by asking subjects to manually select their  
18 comfortable speeds while walking on a treadmill that changes from slow to fast or fast to slow speeds  
19 [10, 11, 12]. Measuring comfortable speeds on a treadmill is useful for certain cases, such as collecting  
20 data in a treadmill-based gait laboratory [13] and studying assistive technologies with immobile systems  
21 [14]. On the other hand, this manual selection process requires the subjects to walk at various speeds,  
22 which can be time consuming, and to consciously distinguish comfortable from uncomfortable treadmill  
23 speeds, which can be confusing for those who are not familiar with walking on a treadmill.

24 Self-paced treadmills can also be useful in measuring walking speed. A treadmill that can seam-  
25 lessly adapt to a subject's walking speed can provide an overground-like walking environment and can  
26 compensate for shortcomings in the manual speed selection approach. Self-pacing controllers typically  
27 consist of two parts, usually treated independently. The first estimates the subject's speed and posi-  
28 tion. The second controls treadmill speed based on the estimation. The treadmill speed is typically  
29 controlled to match subject speed and to keep the subject in the middle of the treadmill [15, 16].  
30 Various approaches of estimating subject speed and position have been used. One approach is to use a  
31 marker-based optical motion capture system [17, 16, 18], which is widely used in research laboratories  
32 as a part of a commercial virtual reality package [19]. Researchers have evaluated these motion capture  
33 based self-paced treadmills by comparing kinematic and kinetic gait features collected on the self-paced  
34 treadmill to those during fixed speed treadmill walking [16] and overground walking [18]. In addition,  
35 these self-paced treadmills have been used in rehabilitation research for children with cerebral palsy  
36 [20, 21], individuals with chronic stroke [22], and individuals with transtibial amputation [23]. Other  
37 approaches with low-cost sensors or simpler hardware have been proposed as well, such as using a  
38 marker-free infrared-based motion sensor [24], an ultrasonic distance sensor [25], a harness with force  
39 sensors [26], and force plates on an instrumented treadmill [15].

40 A self-pacing controller using force-plate data from an instrumented treadmill is attractive because  
41 it does not require additional hardware or instrumentation. Feasel and colleagues [15] have proposed  
42 such a controller and used it to separately control the belts on a split-belt treadmill for asymmetric  
43 gait. They calculated the ground reaction forces and center of pressure from the force-plate data and  
44 combined them with a Kalman filter to track walking speed. The study focused on testing the feasibility  
45 of improving gait symmetry in hemiparetic patients with a virtual environment that integrated the self-  
46 paced treadmill and a visual scene. Although they reported that the hemiparetic patients self-selected  
47 to walk at speeds comparable to their overground speeds, a more thorough evaluation of self-selected  
48 walking speed on this type of self-paced treadmill would improve our understanding of its efficacy.

49 Various aspects of a walking speed test protocol can unexpectedly affect gait and self-selected  
50 walking speed. For example, the treadmill speed controller can induce changes in gait. The mechanics  
51 of walking on a treadmill that moves at a constant speed are identical to overground walking. However,  
52 when the treadmill accelerates, the belt reference frame is no longer equivalent to a fixed-ground  
53 reference [27]. In fact, some belt speed control dynamics can lead subjects to walk at speeds far from  
54 their preferred over-ground speed [28]. People may also choose different speeds for different walking  
55 tasks, such as to walk for a preset time or a preset distance. If people wish to minimize their energy  
56 cost in the fixed distance task, they should walk at a speed close to their normal overground speed. In  
57 order to minimize effort in the fixed time task, however, they should walk very slowly or even stand

58 still [3]. Then again, people might not be familiar with the implications of a fixed-time walking task, or  
59 might place higher weights on comfort or appearance, or might use a heuristic that defaults to a typical  
60 speed in both tasks. The specifics of the task, such as the target distance, may also affect walking  
61 speed [29, 30]. People may also change their walking speed in response to other contextual variations,  
62 such as the visual environment [31, 32] or auditory cues [33]. Even the details of the verbal instructions  
63 provided to participants can have a strong effect on walking speed [34]. Therefore, it is important to  
64 validate the self-selected speed test protocol of interest.

65 A straightforward way of validating a self-selected walking speed test is to compare its measured  
66 speeds to those from the standard walking speed test. However, only a few studies have thoroughly  
67 compared walking speed on a self-paced treadmill to that during overground walking, and most of those  
68 studies were for a motion capture based commercial self-paced treadmill [35, 18]. Van der Krogt and  
69 colleagues [35] compared self-selected speeds of typically developing children and children with cerebral  
70 palsy in outdoor walking, overground walking in a lab, and walking on a self-paced treadmill in a  
71 virtual environment. Children were instructed to “walk at their own preferred, comfortable walking  
72 speed.” Both groups of children walked the fastest outdoor, about 5% slower in the lab, and about 10%  
73 slower on the self-paced treadmill. Similarly, Plotnik and colleagues [18] compared self-selected speeds  
74 in healthy adults during walking for 96 m overground, on a self-paced treadmill, and on a self-paced  
75 treadmill with a virtual environment. Subjects were instructed to “walk at their own self-selected  
76 preferred comfortable speed.” Subjects walked on the self-paced treadmill at speeds comparable to  
77 their overground speeds, while they walked slightly faster when a virtual environment was presented.  
78 In addition, walking speed converged faster to steady speed with the virtual environment. These tests  
79 demonstrate the value of characterizing response to a self-paced treadmill prior to using it to evaluate  
80 the effects of other interventions on self-selected walking speed.

81 Here, we adapt the force-based self-paced treadmill controller proposed by Feasel and colleagues  
82 [15] and evaluate two self-selected walking speed tests using it. First, we explain how the proposed  
83 self-pacing controller estimates subject speed and position and adjusts the treadmill speed. Then, we  
84 evaluate the speed and position estimations of our controller by comparing them with motion capture  
85 data. We then validate the use of the self-paced treadmill for measuring self-selected walking speed. We  
86 compare self-selected walking speeds measured from five different speed tests: the standard 10-meter  
87 overground walk test, a 150-meter overground walk test, a commonly used manual speed selection  
88 treadmill test, a 2-minute self-paced treadmill test, and a 150-meter self-paced treadmill test where  
89 subjects can see their goal and progress on a monitor. We compare self-selected walking speed in the  
90 10 m and 150 m overground conditions to test whether the standard measure well represents speeds  
91 in longer bouts of walking. We validate the self-paced treadmill tests by evaluating how well they  
92 correlate with the standard measure and by comparing them to the commonly used treadmill test. The  
93 2-minute and 150-meter self-paced treadmill tests are compared to each other to examine whether it is  
94 necessary to explicitly motivate subjects to walk at their typical speeds by setting target distance and  
95 showing their progress. Finally, we discuss the implications of our findings and potential extension of  
96 our self-paced treadmill for rehabilitation and assistive device studies.

## 97 **Methods**

### 98 *Self-pacing Algorithm*

99 We revised the self-pacing controller for force-instrumented treadmills proposed by Feasel and col-  
100 leagues [15]. The central idea is to estimate subject walking speed from foot contact positions and to  
101 improve the estimations by incorporating force measurements using a Kalman filter. In our implemen-  
102 tation, we track both speed and position with a Kalman filter, which is updated every time step. The  
103 filter uses noise matrices determined empirically from motion capture data. We provide a complete  
104 description of the algorithm and share the code [36] so that it can be easily used by other researchers.

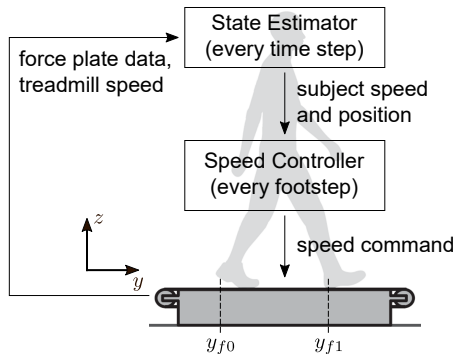

Figure 1: **Self-paced treadmill controller.** The self-paced treadmill controller consists of a State Estimator and a Speed Controller and only uses force plate data as sensory input.

105 Our self-pacing controller consists of a subject State Estimator and a treadmill Speed Controller  
 106 (Fig. 1). The State Estimator takes data from two force plates (third-order Butterworth filter; cutoff  
 107 frequency: 25 Hz) and the treadmill speed as input and estimates the subject’s speed and position  
 108 every computational time step,  $\Delta t$ . Based on the estimated speed and position, the Speed Controller  
 109 adjusts the treadmill speed at the beginning of each footstep.

The State Estimator uses data from the two force plates to measure acceleration, velocity and position of a subject walking on the treadmill and combines the measured values with a Kalman filter. The vertical and fore-aft ground reaction forces (GRFs),  $f_z$  and  $f_y$ , as well as the center of pressure (COP) are calculated from the force-plate data. Foot contact is detected when the vertical GRF exceeds a certain threshold,  $f_z > f_{z0} = 20\%$  of body weight. We defined fore-aft foot position on a given step,  $y_{f1}$ , as the COP at contact detection. Foot position on the prior step in the lab reference frame,  $y_{f0}$ , is calculated by the COP at the previous contact plus the integral of the treadmill speed over the time between the contacts ( $y_{f1}$  and  $y_{f0}$  are shown in Fig. 1). We then estimate the fore-aft acceleration, velocity and position of the subject in the lab reference frame as

$$a_{mes} = \frac{f_y}{m} \quad (1)$$

$$\bar{v}_{mes} = \frac{y_{f1} - y_{f0}}{t_1 - t_0} - \bar{v}_{tm} \quad (2)$$

$$\bar{p}_{mes} \approx \frac{y_{f1} + y_{f0}}{2} \quad (3)$$

110 where  $m$  is the mass of the human subject, and  $t_0$  and  $t_1$  are times when each foot contact occurs,  
 111 and the variables with a bar indicate mean values during that step (i.e. between consecutive foot  
 112 contact detections). Eq. 1 is Newton’s second law. Eq. 2 estimates the subject’s mean speed in the  
 113 lab reference frame,  $\bar{v}_{mes}$ , by subtracting treadmill speed ( $\bar{v}_{tm}$ ) from the subject’s walking speed. The  
 114 subject’s walking speed is calculated as step length ( $y_{f1} - y_{f0}$ ) divided by step time ( $t_1 - t_0$ ). Eq. 3  
 115 defines the subject’s mean position,  $\bar{p}_{mes}$ , as the middle of the leading and trailing foot placements at  
 116 a new foot contact.

117 We implemented a Kalman filter to combine the measurement values  $a_{mes}$ ,  $\bar{v}_{mes}$  and  $\bar{p}_{mes}$  to con-  
 118 tinuously estimate the subject’s speed and position (Table 1). The filter keeps track of subject speed  
 119 and position by predicting them every time step from  $a_{mes}$  (Table 1: line 2), and by correcting them  
 120 with new measurements  $\bar{v}_{mes}$  and  $\bar{p}_{mes}$  every footstep (line 6). The measurement update is conducted  
 121 when a new foot contact is detected (line 4). The filter rejects steps of unreasonable duration (greater  
 122 than 1.2 seconds) to skip the measurement update when subjects cross over the belts (e.g. stepping  
 123 on the left belt with the right foot). The system model,  $A$  and  $B$  (and the observation model  $C = I$ ),

Table 1: Pseudo code of Kalman filter for walking speed and position estimation.

| Pseudo code                                                                                                                                                                                                                                                   | Note                                              |
|---------------------------------------------------------------------------------------------------------------------------------------------------------------------------------------------------------------------------------------------------------------|---------------------------------------------------|
| 0: $p_{KF} = 0, v_{KF} = 0, P = P_0$                                                                                                                                                                                                                          | initialize                                        |
| 1: <b>loop</b>                                                                                                                                                                                                                                                | (every time step)                                 |
| 2: $\begin{bmatrix} p_{KF} \\ v_{KF} \end{bmatrix} = A \begin{bmatrix} \bar{p}_{KF} \\ \bar{v}_{KF} \end{bmatrix} + B [a_{mes}]$                                                                                                                              | time update:<br>predict speed and position        |
| 3: $P = A \cdot P \cdot A^T + B \cdot Q \cdot B^T$                                                                                                                                                                                                            | update error covariance matrix                    |
| 4: <b>if</b> a new foot contact is detected                                                                                                                                                                                                                   | (every footstep)                                  |
| 5: $K = P \cdot (P + R)^{-1}$                                                                                                                                                                                                                                 | update Kalman gain                                |
| 6: $\begin{bmatrix} p_{KF} \\ v_{KF} \end{bmatrix} = \begin{bmatrix} \bar{p}_{KF} \\ \bar{v}_{KF} \end{bmatrix} + K \left( \begin{bmatrix} \bar{p}_{mes} \\ \bar{v}_{mes} \end{bmatrix} - \begin{bmatrix} \bar{p}_{KF} \\ \bar{v}_{KF} \end{bmatrix} \right)$ | measurement update:<br>correct speed and position |
| 7: $P = (I - K) \cdot P$                                                                                                                                                                                                                                      | update error covariance matrix                    |
| 8: <b>end if</b>                                                                                                                                                                                                                                              |                                                   |
| 9: <b>end loop</b>                                                                                                                                                                                                                                            |                                                   |

$$A = \begin{bmatrix} 1 & \Delta t \\ 0 & 1 \end{bmatrix}, B = \begin{bmatrix} \frac{\Delta t^2}{2} \\ \Delta t \end{bmatrix}, \Delta t = 0.001$$

$$Q = B \cdot B^T \cdot \sigma_a^2 = 2.9 \times \begin{bmatrix} \frac{\Delta t^4}{4} & \frac{\Delta t^3}{2} \\ \frac{\Delta t^3}{2} & \Delta t^2 \end{bmatrix}$$

$$R = \begin{bmatrix} \sigma_p \\ \sigma_v \end{bmatrix} \cdot \begin{bmatrix} \sigma_p \\ \sigma_v \end{bmatrix}^T = 10^{-3} \times \begin{bmatrix} 0.6 & 0 \\ 0 & 7.2 \end{bmatrix}$$

$$P_0 = 10^{-3} \times \begin{bmatrix} 3.5 & 1.5 \\ 1.5 & 1.6 \end{bmatrix}$$

Note that we omitted the observation matrix in lines 5~7 as it is the identity matrix ( $C = I$ ).

124 describes the relationship between the measurement values according to Newton's second law. The  
 125 noise matrices,  $Q$  and  $R$ , as well as the initial error covariance matrix  $P_0$  are determined from data  
 126 collected in walking sessions, where two subjects walked on a treadmill at speeds between 0.8 and 1.8  
 127  $\text{m s}^{-1}$  in ten one-minute trials. The noise matrices are set based on  $\sigma_a$ ,  $\sigma_v$  and  $\sigma_p$  (Table 1), which are  
 128 the differences in  $a_{mes}$ ,  $\bar{v}_{mes}$  and  $\bar{p}_{mes}$ , respectively, calculated from force-plate data and motion capture  
 129 data.  $P_0$  is set to the mean of the values  $P$  converged to at the end of the pilot sessions.

The Speed Controller adjusts the treadmill speed to match subject speed and to keep the subject near a baseline position. It updates the treadmill speed once per footstep when a new foot contact is detected. This is different from other self-paced treadmills in previous studies, where speed adjustment is done at a much faster rate (30~120 Hz) [17, 16, 18]. Controlling the treadmill speed at a higher frequency can lead to undesired dynamics due to natural speed oscillations during walking. Instead of filtering out these oscillations as in the previous studies, we update it at every footstep. Target treadmill speed is set as

$$v_{tm,tgt} = \bar{v}_{tm} + G_v \bar{v}_{KF} + G_p (\bar{p}_{KF} - p_0) \quad (4)$$

where  $p_0$  is the baseline position, and  $\bar{v}_{KF}$  and  $\bar{p}_{KF}$  are the subject's mean speed and position during the last step in the lab reference frame estimated from the Kalman filter. Note that, despite the plus signs, Eq. 4 is a stabilizing negative feedback as the treadmill speeds,  $v_{tm,tgt}$  and  $\bar{v}_{tm}$ , are determined in the opposite direction from the subject speed and position,  $\bar{v}_{KF}$  and  $\bar{p}_{KF}$ , in the lab reference frame. The baseline position  $p_0$  can be predetermined by the experimenter (e.g.  $p_0 = 0$ ), manually tuned based on subject feedback, or set based on subject data from familiarization trials. In this study, we used the last approach, where we set  $p_0$  for each subject as the average subject position measured during the fixed-speed portion of the treadmill familiarization. In theory,  $v_{tm,tgt}$  with  $G_v = 1$  will be a speed that matches the subject's estimated walking speed, and  $G_p = 1$  will result in a speed that brings the subject to  $p_0$  in 1 second. However, in pilot tests, we found a controller with these high gains to be unstable. Therefore, we use lower gains of  $G_v = 0.25$  and  $G_p = 0.1$ , which we found to be reliable and responsive enough for our study. The treadmill acceleration is set to achieve a target velocity in a certain time as

$$a_{tm,tgt} = \frac{(v_{tm,tgt} - \bar{v}_{tm})}{\Delta t_{tm,tgt}} \quad (5)$$

130 where we use  $\Delta t_{tm,tgt} = 0.5$  sec, similar to the duration of a walking step.

131 The code of our self-pacing controller and a graphical user interface are publicly available [36]. The  
132 self-pacing controller is implemented in Matlab/Simulink Real-Time and runs on a real-time target ma-  
133 chine (Speedgoat) at 1000 Hz (i.e.  $\Delta t = 0.001$ ). The real-time target machine receives force-plate data  
134 from the instrumented treadmill (Bertec) at the same rate. The graphical user interface implemented  
135 in Matlab runs on a desktop machine at 100 Hz and allows the experimenter to communicate with the  
136 real-time target machine. In addition, it receives the target treadmill speed and acceleration from the  
137 real-time target machine and commands it to the treadmill.

### 138 *Experiment 1: State Estimator*

139 To evaluate the State Estimator, we compared the estimated position and velocity to those from  
140 motion capture data. One subject wore a waist belt with four reflective markers and walked on the  
141 force-instrumented treadmill for six one-minute trials. Treadmill speed was manually controlled in most  
142 of these trials as we wanted to evaluate the State Estimator independently from the Speed Controller.  
143 In the first three trials, the treadmill speed was set to 1.3, 0.8 and 1.8  $\text{m s}^{-1}$ . In the fourth trial,  
144 the treadmill speed changed every 10 sec from 0.8, 1.0, 1.2, 1.4, 1.6 to 1.8  $\text{m s}^{-1}$ . In the fifth trial,  
145 the same speeds were presented in reverse order. Then, the treadmill was controlled with our self-  
146 pacing controller in the last trial. Positions of the four reflective markers were captured with a motion  
147 capture system (Vicon Vantage; 8 cameras), sampled in 100 Hz and low-pass filtered using a third-order  
148 Butterworth filter with a cutoff frequency of 20 Hz. The mean of those marker positions,  $p_{mocap}$ , and  
149 its time derivative,  $v_{mocap}$ , were used for evaluation.

150 We report how the main outputs of the State Estimator  $\bar{v}_{KF}$  and  $\bar{p}_{KF}$  compare to those from  
151 motion capture data. For the mean step velocity, we report the root-mean-square (RMS) differences,  
152  $RMS_{\bar{v}} = \sqrt{\frac{1}{n} \sum_{step=i}^n (\bar{v}_{KF,i} - \bar{v}_{mocap,i})^2}$ , where  $n$  is the total number of steps in a walking trial, and  
153  $\bar{v}_{mocap,i}$  is the mean value of  $v_{mocap}$  on the  $i^{th}$  step.  $RMS_{\bar{p}}$  was calculated similarly, but with offset-  
154 corrected values for each one-minute trial. This is because  $\bar{p}_{KF}$  is not tracking the position of the waist.  
155 Our approach does not estimate the absolute position of the person's center of mass, but rather its  
156 position relative to the average center of pressure at consecutive foot strikes. Note that any measure  
157 of body position can be used to maintain a desirable position on the treadmill by comparing it to a  
158 corresponding nominal value, typically determined during a fixed speed calibration trial. In this sense,  
159 it is unlikely that any aspect of body position is more useful than any other for self-pacing purposes;  
160 only the displacement relative to the nominal position matters.

161 *Experiment 2: Self-selected Walking Speed Tests*

162 We conducted an experiment to evaluate the validity of our self-paced treadmill in measuring self-  
 163 selected walking speeds. Ten healthy adults (5 females and 5 males; height:  $1.69 \pm 0.08$  m; age:  
 164  $25 \pm 3$  years) participated in the experiment. All subjects participated in a session that consists of  
 165 familiarization trials and three blocks of five walking speed tests (Fig. 2-a). The familiarization trials  
 166 were for the subjects to get familiar with walking on our self-paced treadmill and at their comfortable  
 167 speed in different settings. In addition, the subject's baseline position,  $p_0$ , was found in the fixed-speed  
 168 portion of the treadmill familiarization. The five walking speed tests in each of the three blocks  
 169 were presented in random order.

170 We compared five different self-selected walking speed tests. The settings and measurements of  
 171 the tests are described in Fig. 2-b. Overground 10 m is the standard 10-meter walk test [9, 37] that  
 172 we used as a reference point in evaluating the outcomes of the other tests. Overground 150 m is to

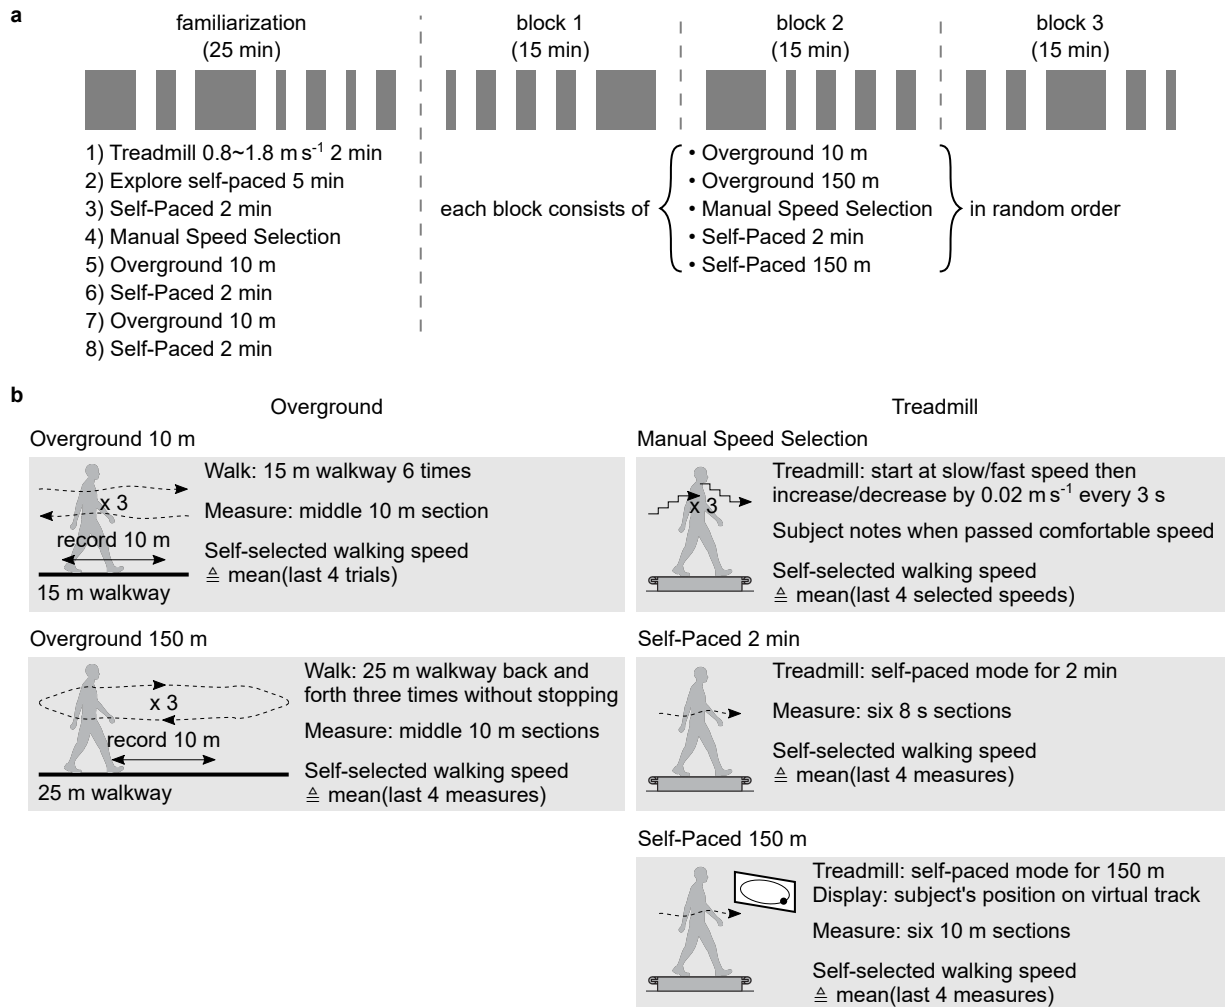

Figure 2: **Experimental protocol for self-selected walking speed tests.** **a.** The protocol consists of a familiarization session and the main session organized into three blocks. The familiarization session consists of eight overground and treadmill walking trials, which in total takes about 25 minutes. In self-paced treadmill trials, the treadmill first starts at a slow speed,  $0.8 \text{ m s}^{-1}$ , then switches to self-paced mode. Each of the blocks in the main session takes about 15 minutes and consists of five self-selected walking speed tests in random order. **b.** The five walking speed tests consist of two overground and three treadmill tests. In the overground tests, subjects start to walk from standing at the experimenter's verbal sign "3, 2, 1, go," and the experimenter measures with a stopwatch the time it takes for the subject to traverse the middle 10 m sections. In the treadmill tests, the treadmill starts at  $0.8 \text{ m s}^{-1}$  then switches to either speed sweep mode in Manual Speed Selection or self-paced mode in Self-Paced 2 min and Self-Paced 150 m. In Self-Paced 150 m, a monitor shows a 150 m virtual track and a black circle tracking the subject's position.

173 check whether the standard test represents longer distance walking, as walking distance can affect self-  
174 selected speed [30]. Manual Speed Selection is a common way to measure preferred walking speed on  
175 a treadmill [10, 11, 12]. The correlation between the speed measures in Manual Speed Selection and  
176 those in Overground 10 m will be the benchmark value for our self-paced treadmill tests. Self-Paced 2  
177 min and Self-Paced 150 m are the tests using our self-paced treadmill. Subjects were informed whether  
178 they would walk for 2 min or 150 m, and, for the latter, subject position was shown on a 150 m virtual  
179 track on a monitor in real-time. We applied both fixed-time and fixed-distance tests on the self-paced  
180 treadmill to determine whether it was necessary to motivate participants to walk a given distance in  
181 order to obtain self-selected walking speeds that correlated well with overground, fixed-distance tasks.

182 The self-selected walking speed tests were designed to be coherent and comparable with each other.  
183 For example, 150 m of walking distance in Self-Paced 150 m was selected to match the distance in  
184 Overground 150 m, and the 2 min of walking time in Self-Paced 2 min is the time it takes to walk  
185 150 m at a typical walking speed of  $1.25 \text{ m s}^{-1}$ . Similarly, in Self-Paced 2 min and Self-Paced 150 m,  
186 walking speeds were measured in six sections that correspond to the 10-meter-sections in Overground  
187 150 m. We used consistent instructions in all the walking trials [34]. Subjects were instructed to “walk  
188 at a comfortable speed” in the overground and self-paced treadmill tests and to verbally indicate when  
189 the treadmill gets “faster (or slower) than what you would choose as a comfortable speed” in Manual  
190 Speed Selection. When subjects asked for clarification, we elaborated a comfortable speed as “whatever  
191 speed feels natural to you.”

192 We compared self-selected walking speeds measured in each test to the value in the standard over-  
193 ground test. The main evaluation was how well walking speed in each test correlated with the speed  
194 in the standard test, Overground 10 m. We also compared self-selected speeds in Self-Paced 2 min and  
195 Self-Paced 150 m to see whether setting a target walking distance was necessary. In total, we measured  
196 5 sets of 30 self-selected walking speeds: in the five tests, ten subjects walked for three times. For each  
197 walking speed test other than Overground 10 m, we report a linear model,  $b_1 v_{OG10} + b_0$ , that fits these  
198 30 measurements to those in Overground 10 m with the minimum mean-squared-error. A test that  
199 has a fit of  $b_1 = 1$  and  $b_0 = 0$  indicates that subjects, on average, are likely to walk at the same speed  
200 they walked at in Overground 10 m. We also calculate the Pearson’s linear correlation coefficient,  $R$ ,  
201 in these pairs of 30 measurements. The correlation coefficient of 1 and 0 correspond to perfect and  
202 no correlation, respectively, where a high correlation indicates that much of the variation in measured  
203 speeds are captured in the fitted linear model. We considered the linear fit and correlation values to  
204 be statistically significant if their  $p$ -value is smaller than 0.05.

205 We calculated the variability of self-selected walking speed in each test to determine whether the  
206 self-paced treadmill tests were as consistent as the standard overground test. To this end, we calculated  
207 the standard deviation of the three walking speed measurements of the same subject within each test,  
208  $SD_{intra}$ . We compared these standard deviation values in each test to determine whether certain tests  
209 show higher variability than others.

210 We estimated the time taken to conduct one trial of each walking test to determine whether the self-  
211 paced treadmill tests required less time than the common treadmill test. We calculated the minimum  
212 time used in all trials in our experiments from the recorded data and report their mean and standard  
213 deviation for each walking test. The time for an Overground 10 m trial is calculated as  $T_{OG10} =$   
214  $1.5 \times T_{OG10,rec} + 6 \times 3$ , where  $T_{OG10,rec}$  is the sum of six recorded times for crossing the 10 m section,  
215 multiplication of 1.5 accounts for the additional 5 m walk of the 15 m walkway, and the last term is the  
216 three-second countdowns before each of the six bouts. For  $T_{OG150}$  of the Overground 150 m test, we  
217 report the recorded time taken by subjects in completing the 150 m course plus 3 s for the countdown.  
218 The time used in the Manual Speed Selection,  $T_{MSS}$  is reported as the duration the treadmill was  
219 controlled in speed sweep mode plus 3 s for the countdown. Similarly, the times used in Self-Paced 2  
220 min,  $T_{SP2}$ , and Self-Paced 150 m,  $T_{SP150}$ , are reported as the duration the treadmill was in self-paced



221 mode plus 3 s. Most of the reported times underestimate the actual time required for trials; for example,  
222 there were a few additional seconds between each of the six bouts in an Overground 10 m trial, and a  
223 few seconds spent before and after speed sweep and self-paced modes in the treadmill trials.

224 We calculated the time required for walking speed to converge in self-paced treadmill tests to  
225 determine the minimum duration of a test with reliable measurements. We observed that participants  
226 seemed to converge to steady speed in much less time than the approximately two minutes provided  
227 in self-paced walking speed tests. To determine the convergence time in Self-Paced 2 min, we first  
228 calculated the mean and standard deviation of walking speeds during the last 20%, or the last 24 sec,  
229 of the trial. Then we found the moment when walking speed first entered the range of the mean plus  
230 or minus one standard deviation, and determined it to be the convergence time,  $t_{conv}$ . We determined  
231 the convergence distance in Self-Paced 150 m similarly by setting the threshold from the mean and  
232 standard deviation of the last 30 m of the trial. Note that the initial treadmill speed was  $0.8 \text{ m s}^{-1}$  in  
233 all the self-paced treadmill trials.

234 We assessed subject experience in each walking speed test with a survey in order to determine  
235 whether the self-paced tests were comfortable and intuitive compared to the standard tests. Subjects  
236 rated two written statements for each test after completing all the walking trials. The statements were  
237 “it was comfortable walking” and “it was easy to choose my walking speed,” and the subjects had five  
238 options: *strongly disagree*, *disagree*, *neutral*, *agree*, and *strongly agree*. We quantified the selections by  
239 assigning scores from 1 to 5 for *strongly disagree* to *strongly agree*, respectively.

240 The statistical significance of differences across walking speed tests, in terms of intra-subject vari-  
241 ation, time to measure, and survey scores, was tested using two-way analysis of variance (ANOVA)  
242 accounting for different tests and subjects. If a significant effect of test type was found in ANOVA, we  
243 conducted paired-sample  $t$ -test for every pair of tests. We used significance level of  $\alpha = 0.05$ .

## 244 Results

### 245 *Self-pacing Algorithm*

246 The proposed self-pacing controller successfully matched subject speed and kept subjects near the  
247 baseline position. In the exploration trial of the familiarization session, all subjects easily walked (or  
248 even ran) on the self-paced treadmill at a wide range of speeds (about 0 to  $2 \text{ m s}^{-1}$ ).

### 249 *Experiment 1: State Estimator*

250 The State Estimator and motion capture system were in close agreement as to the subject speed and  
251 position. The RMS differences between estimations of the Kalman filter and motion capture system  
252 during the six one-minute trials were  $RMS_{\bar{v}} = 0.023 \pm 0.003 \text{ m s}^{-1}$  and  $RMS_{\bar{p}} = 0.014 \pm 0.008 \text{ m}$ .  
253 Fig. 3 shows the Kalman filter estimations of the subject speed and position,  $v_{KF}$  and  $p_{KF}$ , and their  
254 mean values during each step,  $\bar{v}_{KF}$  and  $\bar{p}_{KF}$ , as well as those values from the motion capture data.  
255 In addition, the speed and position calculated by merely integrating ground reaction forces are shown  
256 to diverge, demonstrating the necessity of the once-per-footstep measurement update of the Kalman  
257 filter. Time update using subject acceleration (Table 1: line 2) allows continuous and more accurate  
258 tracking of subject speed and position.

### 259 *Experiment 2: Self-selected Walking Speed Tests*

260 All ten subjects completed the self-selected walking speed test protocol. In the standard Overground  
261 10 m test, the mean and standard deviation of the self-selected walking speeds were  $1.32 \pm 0.18 \text{ m s}^{-1}$ ,  
262 ranging from 0.98 to  $1.79 \text{ m s}^{-1}$ . Leg length, defined as the distance between anterior iliac spine and the  
263 medial malleolus, explained 20% of the variance in self-selected walking speed ( $R^2 = 0.20$ ,  $p = 0.01$ ),  
264 which agrees with previous studies [1].

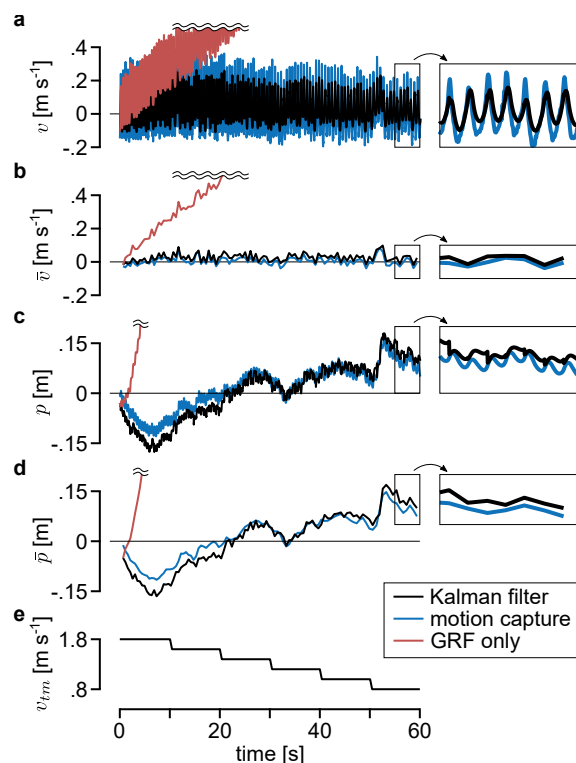

Figure 3: **Estimations of State Estimator and motion capture system.** The plots show the subject’s estimated **a.** instantaneous speed  $v$ , **b.** mean speed of each step,  $\bar{v}$ , **c.** instantaneous position,  $p$ , and **d.** mean position of each step,  $\bar{p}$ . All speeds and positions are in the lab reference frame. The values are estimated with the proposed Kalman filter (black line), motion capture system (blue line), and by simply integrating the ground reaction forces (red line). **e.** The data are collected during a one-minute trial where the treadmill speed,  $v_{tm}$ , changes from 1.8 to 0.8  $\text{m s}^{-1}$  as shown in the bottom plot.

265 Walking speeds measured in Overground 150 m were close to those in Overground 10 m. The fitted  
 266 linear model was close to the identity line with a high correlation coefficient (Fig. 4-a). The mean and  
 267 standard deviation of walking speeds were  $1.35 \pm 0.19 \text{ m s}^{-1}$ . This result supports that the standard  
 268 test, Overground 10 m, reliably measures walking speed in longer distance walking.

269 Speeds in Manual Speed Selection were highly correlated with those in Overground 10 m but were  
 270 slower overall. Walking speeds in Manual Speed Selection were  $1.18 \pm 0.24 \text{ m s}^{-1}$ , which was significantly  
 271 lower ( $p = 0.01$ ) than those in Overground 10 m (Fig. 4-b). This result agrees with previous studies  
 272 with similar treadmill speed selection tests [10, 12]. The correlation value of  $R = 0.89$  between Manual  
 273 Speed Selection and Overground 10 m is set as the benchmark for our self-paced treadmill tests.

274 Both Self-Paced 2 min and Self-Paced 150 m were highly correlated with Overground 10 m. The  
 275 correlation coefficients of the self-paced treadmill tests ( $R = 0.93$  and  $R = 0.94$ ) were slightly higher  
 276 than for Manual Speed Selection (Fig. 4-c and d vs. b). The walking speeds in self-paced treadmill tests  
 277 were  $1.23 \pm 0.28 \text{ m s}^{-1}$  and  $1.23 \pm 0.27 \text{ m s}^{-1}$ , respectively. The speeds were not significantly different  
 278 from Overground 10 m speeds ( $p = 0.13$  in both tests) and were slightly closer than Manual Speed  
 279 Selection speeds were. However, participants with slower overground walking speeds reduced their  
 280 speed more on the treadmill. The three slowest subjects walked significantly slower in the self-paced  
 281 treadmill tests compared to the standard test ( $0.87 \pm 0.11$  vs.  $1.11 \pm 0.07$ ,  $p = 6 \times 10^{-5}$ ), while the  
 282 remaining seven subjects did not ( $1.38 \pm 0.15$  vs.  $1.41 \pm 0.13$ ,  $p = 0.49$ ).

283 Walking speeds measured in Self-Paced 2 min and Self-Paced 150 m were very similar. The fitted  
 284 model was close to the identity line ( $v_{SP150} = 0.96v_{SP2} + 0.06$ ), and the correlation coefficient was very  
 285 high ( $R = 0.98$ ,  $p = 7 \times 10^{-20}$ ).

286 The intra-subject variabilities in all tests were low and were not significantly different ( $p = 0.49$ ).

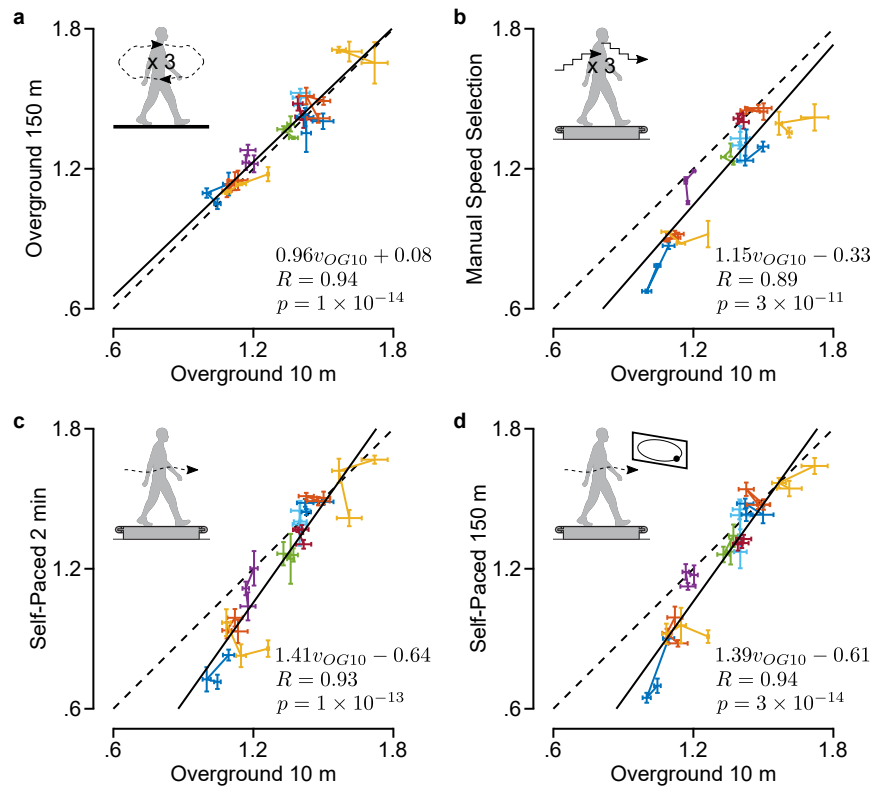

Figure 4: **Speeds measured in the self-selected walking speed tests.** The self-selected walking speeds measured in **a.** Overground 150 m, **b.** Manual Speed Selection, **c.** Self-Paced 2 min, and **d.** Self-Paced 150 m are compared to those from Overground 10 m. The data points relate a self-selected walking speed measured in a test to the one measured in the standard test in the same block. Each data point is a mean of four measurements (Fig. 2), with whiskers depicting  $\pm 1$  standard deviation. The exception is for Manual Speed Selection, where the standard deviation is for two measurements because a pair of faster and slower than comfortable speeds are required to obtain one measurement of comfortable speed. Three data points from the same subject are connected with a line and marked in the same color. The linear model, correlation coefficient, and  $p$ -value for the fit are shown at the bottom right of each plot.

287 The average across all tests and participants was  $SD_{intra} = 0.042 \pm 0.030 \text{ m s}^{-1}$ . The variability values  
 288 of individual tests were all lower than  $0.1 \text{ m s}^{-1}$ , which has been suggested as a threshold for clinical  
 289 significance of differences in walking speed [5, 6, 9].

290 The self-paced treadmill tests required about a third of the time required for Manual Speed Selection.  
 291 The mean and standard deviation of the times required for a trial of each test were  $T_{OG10} = 87 \pm 9$   
 292 s,  $T_{OG150} = 124 \pm 16$  s,  $T_{MSS} = 371 \pm 141$  s,  $T_{SP2} = 125 \pm 1$  s, and  $T_{SP150} = 138 \pm 35$  s. Walking  
 293 speed test type had a significant effect on measurement time (ANOVA,  $p = 4 \times 10^{-37}$ ). All the tests  
 294 were significantly different from each other (paired  $t$ -tests,  $p < 0.002$ ), except for Self-Paced 2 min  
 295 and Self-Paced 150 m ( $p = 0.051$ ) and for Overground 150 m and Self-Paced 2 ( $p = 0.754$ ). Manual  
 296 Speed Selection took the longest on average and also was the most variable across subjects. The large  
 297 time variation was due to some subjects having large gaps between the speeds identified to be faster  
 298 or slower than comfortable speeds while others had smaller gaps.

299 Analysis of speed convergence in the self-paced treadmill tests suggests that the preset time and  
 300 distance can be much shorter than 2 min and 150 m. The mean and standard deviation of the conver-  
 301 gence time in Self-Paced 2 min were  $t_{cnvg} = 22 \pm 22$  s while mean and standard deviation of convergence  
 302 distance in Self-Paced 150 m were  $d_{cnvg} = 42 \pm 29$  m (Fig. 5). The convergence distance in Self-Paced  
 303 150 m,  $d_{cnvg}$ , corresponded to  $t_{cnvg} = 34 \pm 22$  s in time, significantly longer than in Self-Paced 2 min  
 304 ( $p = 0.048$ ). This result suggests that the times used in the current Self-Paced 2 min ( $T_{SP2} = 125$  s)  
 305 and Self-Paced 150 m ( $T_{SP150} = 138$  s) could be much shorter. For example, the average speed during

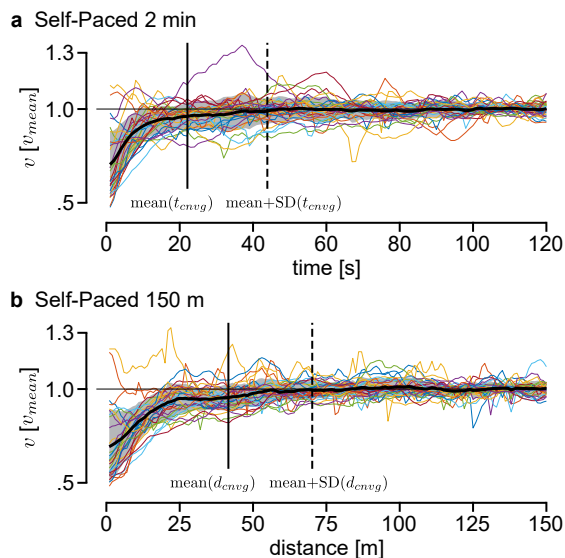

Figure 5: **Convergence of walking speeds in self-paced treadmill tests.** Walking speeds normalized by final estimated speed in **a.** Self-Paced 2 min and **b.** Self-Paced 150 m tests. Walking speed from individual trials are shown in colored lines. The mean and  $\pm 1$  standard deviation across all trials are shown as a black line and gray shaded area. The solid and dotted vertical lines indicate the mean and mean plus one standard deviation of convergence time and distance.

306 the last five seconds of the first minute of the Self-Paced 2 min test is not statistically different from the  
307 current measure ( $p = 0.89$ ). This would require about one sixth the time of the conventional treadmill  
308 speed test.

309 The survey results suggested that subjects found walking at their comfortable speeds in the self-  
310 paced treadmill tests to be as comfortable as in the common treadmill speed selection test but not  
311 as comfortable as in overground tests. The mean and standard deviation of the scores for “it was  
312 comfortable walking” were  $4.3 \pm 0.7$  for Overground 10 m,  $4.4 \pm 0.5$  for Overground 150 m,  $3.5 \pm 1.0$  for  
313 Manual Speed Selection,  $3.9 \pm 0.7$  for Self-Paced 10 m, and  $3.8 \pm 0.8$  for Self-Paced 150 m, where 1 is  
314 *strongly disagree* and 5 is *strongly agree*. The scores for the “it was easy to choose my walking speed”  
315 statement were  $4.4 \pm 0.7$ ,  $4.5 \pm 0.7$ ,  $3.0 \pm 1.2$ ,  $3.3 \pm 0.7$  and  $3.4 \pm 1.0$ , respectively. Speed test type  
316 had a significant effect on survey results (ANOVA,  $p = 0.002$  and  $1 \times 10^{-5}$ , respectively). Comfort and  
317 ease of speed selection in self-paced tests were not significantly different from those in the conventional  
318 treadmill test (paired  $t$ -tests,  $p > 0.10$ ) but were worse than those in overground tests ( $p < 0.053$ ).

## 319 Discussion

320 Our results indicate that the proposed self-paced treadmill can be used to measure self-selected  
321 walking speed. Subjects selected walking speeds in both self-paced treadmill tests that were highly  
322 correlated with their speeds in the standard overground test. Intra-subject speed variations in the self-  
323 paced treadmill tests were low, demonstrating repeatability. The self-paced treadmill tests required  
324 only about a third of the time to complete of a common treadmill test, with no reduction in comfort  
325 or ease.

326 Although the walking speeds from self-paced treadmill tests highly correlated with the standard 10-  
327 meter walk test, the actual speeds were not the same. More specifically, subjects who walked at slow  
328 speeds in Overground 10 m walked even slower in Self-Paced 2 min and Self-Paced 150 m (Fig. 4-c,d).  
329 We can speculate different reasons for this observation. First, our self-pacing controller may be tuned  
330 better for normal and fast walking than walking at slow speeds. However, that would not explain why  
331 the slow walking subjects also selected slower speeds in Manual Speed Selection (Fig. 4-b). Second,

332 which is more compelling in our opinion, contextual changes [31, 32, 33] other than segment dynamics  
333 (i.e. force interactions between subjects and the treadmill or ground) may have a larger effect during  
334 slower walking. The influence of these contextual changes may depend on walking speed because control  
335 strategies may change for different speeds [38, 39] as modeling studies suggest slower walking should  
336 rely more on active balance control than on passive dynamics [40]. This hypothesis could be tested  
337 by studying how the amount of context-induced gait changes correlate with walking speed. Whatever  
338 the reason, the strong correlation between self-paced and overground speeds suggests that changes in  
339 self-selected walking speed on the self-paced treadmill will translate into changes during overground  
340 walking, though the absolute magnitudes may differ.

341 Subjects selected to walk at very similar speeds on our self-paced treadmill whether they were  
342 walking for a preset time or a preset distance. This was unexpected because it would seem inconsistent  
343 with the minimum effort principle. So why did subjects walk at similar speeds in the preset time  
344 (Self-Paced 2 min) and present distance (Self-Paced 150 m) tests? First, subjects may have tried to  
345 fulfill the experimenter's expectation. We instructed the subjects to walk at their comfortable speed in  
346 all five tests, which the subjects may have interpreted as walking at a particular speed. However, such  
347 interpretation or intent of matching experimenter expectation was not apparent from subject feedback.  
348 Second, it could be that the objective of walking for a preset time was not clear to subjects because it  
349 is different enough from other walking tasks that they had experienced. Walking for a preset distance  
350 is close to walking to a target location, which is very common in daily life. Walking or running on a  
351 treadmill in a gym for a preset time as a workout might seem similar but is different from the preset  
352 time test in our study, in that the speed is usually set based on energy expenditure goals. For the  
353 unique task of walking for a preset time in an experiment, subjects may have aimed to walk in a way  
354 they were most familiar with, which is to walk for a preset distance. Regardless of the reason, all  
355 subjects in our study self-selected to walk at similar speeds in the preset time and preset distance tests.  
356 Therefore, we can use the preset time on a self-paced treadmill to measure self-selected walking speeds,  
357 which can be easier to administer than for preset distance.

358 The proposed self-pacing controller is different from most previous controllers in that it uses data  
359 from treadmill force plates to estimate subject speed and position. Therefore, it requires a force-  
360 instrumented treadmill, and subjects should not cross over the belts when stepping, which can interfere  
361 with their natural gait. However, stepping on the correct belt on an instrumented treadmill is a  
362 common requirement for gait studies [13], in which case, the self-pacing controller can be used with  
363 little overhead. We have previously tested other approaches that require additional parts on subjects,  
364 such as motion capture markers or string potentiometers, and those setups can easily increase the  
365 burden in complex gait experiments, such as studies on robotic exoskeletons or prostheses [14, 41]. A  
366 useful future extension in this direction is improving the self-pacing controller to work with a single  
367 force-plate, which would allow subjects to cross over the belts.

368 Another difference from most prior self-pacing controllers is that ours adjusts the treadmill speed  
369 only once per footstep. Most other self-paced treadmill controllers update treadmill speed at a higher  
370 frequency (30~120 Hz) [17, 16, 18]. If the treadmill speed instantaneously matches subject body speed,  
371 it will fluctuate within every stride due to natural speed oscillations in normal walking (Fig. 3-a) and  
372 may introduce undesired treadmill dynamics. To minimize this effect, previous studies low-pass filtered  
373 the estimated body state with a low cutoff frequency (e.g. 2 Hz), which can introduce time delays.  
374 Instead, our controller updates the treadmill speed once-per-footstep based on the mean values in that  
375 footstep. We find our approach to be conceptually more consistent with the control goal of matching  
376 walking speed, not instantaneous speed. A more thorough investigation of treadmill speed adjustment  
377 strategies could be instructive and might improve the self-pacing controller. For example, we use a  
378 simple heuristic control scheme (Eq. 4) with low control gains in matching subject speed and position,  
379 which is similar to previous approaches [16]. While higher gains can respond more quickly to speed

380 and position changes, we empirically found lower gains to be stable and reliable for walking at steady  
381 speeds and moderate speed changes. Gain scheduling that matches large speed changes as well as  
382 steady walking would extend the potential use of self-paced treadmills in gait studies.

383 The proposed self-paced treadmill can be used in rehabilitation treatment and in gait assistance  
384 research but should be re-validated for substantially different populations or tasks. All of the sub-  
385 jects that participated in our experiment found walking on the self-paced treadmill intuitive and easy.  
386 However, the subtle dynamics and apparent contextual differences induced by self-paced treadmills  
387 may have a larger effect for subjects with different health status or for different locomotion tasks. For  
388 example, it has been reported that children with cerebral palsy experienced larger changes in gait on  
389 a self-paced treadmill than typically developing children [35]. Nevertheless, for healthy adults walking  
390 at typical speeds, self-selected walking speed on this self-paced treadmill can be used as an indication  
391 of overground walking behavior.

## 392 **Conclusions**

393 We presented a self-paced treadmill controller for force-instrumented treadmills that can be used to  
394 measure self-selected walking speeds. The controller is adapted from a previous study [15] and solely  
395 uses force-plate data to estimate and adapt to the subject's walking speed and position. To validate  
396 its use for measuring self-selected walking speeds, we compared walking speeds measured in a range of  
397 walking speed tests, where the subjects were instructed to walk at or select their comfortable speed.  
398 The tests using our self-paced treadmill measured walking speeds that were highly correlated with those  
399 from the standard overground test. The differences in the measured speeds from the self-paced treadmill  
400 and overground tests were small but consistent. The low intra-subject variability of measured speeds  
401 supports the reliability of the self-paced treadmill tests. The times required for the self-paced treadmill  
402 tests were a few times less than that for a common treadmill test, where subjects manually select their  
403 comfortable speeds, with the potential for further substantial reductions in duration. Subjects found  
404 the self-paced treadmill tests to be as comfortable and easy as the common treadmill test. These results  
405 demonstrate that measurements of self-selected walking speed made using the self-paced treadmill are  
406 relevant to overground conditions, and that the self-paced treadmill provides a strong alternative to  
407 manual speed selection on an instrumented treadmill. We provide a complete description and code for  
408 the self-pacing controller and graphical user interface to facilitate use by other gait researchers and  
409 clinicians [36].

## 410 **Abbreviations**

411 ANOVA: analysis of variance; GRF: ground reaction force; COP: center of pressure; RMS: root mean  
412 square

## 413 **Acknowledgements**

414 The authors thank all participants of this study as well as Maxwell Donelan and Arthur Kuo for  
415 discussions about preset time and preset distance walking.

## 416 **Author's contributions**

417 SS and SC conceived the study and designed the experiment, SS and HC developed the algorithm, SS  
418 conducted experiments and analyzed data, SS drafted the manuscript, SS and SC edited the manuscript,  
419 and all authors approved the submitted manuscript.

## 420 **Funding**

421 This material is based upon work supported by the National Science Foundation under Grant No.  
422 CMMI-1734449.

## 423 **Availability of data and materials**

424 All data collected in the study are available from the corresponding author on reasonable request. The  
425 code for self-paced treadmill is available in the self-paced-treadmill repository on GitHub [36].

## 426 **Ethics approval and consent to participate**

427 Ethical approval for the study was granted by the Stanford University Institutional Review Board. All  
428 participants provided written informed consent.

## 429 **Consent for publication**

430 Not applicable.

## 431 **Competing interests**

432 The authors declare that they have no competing interests.

## 433 **References**

- 434 [1] R. W. Bohannon, Comfortable and maximum walking speed of adults aged 20-79 years: reference  
435 values and determinants, *Age and ageing* 26 (1997) 15–19.
- 436 [2] H. J. Ralston, Energy-speed relation and optimal speed during level walking, *Internationale*  
437 *Zeitschrift für Angewandte Physiologie Einschliesslich Arbeitsphysiologie* 17 (1958) 277–283.
- 438 [3] M. Srinivasan, Optimal speeds for walking and running, and walking on a moving walkway, *Chaos:*  
439 *An Interdisciplinary Journal of Nonlinear Science* 19 (2009) 026112.
- 440 [4] S. Song, H. Geyer, Predictive neuromechanical simulations indicate why walking performance  
441 declines with ageing, *The Journal of physiology* 596 (2018) 1199–1210.
- 442 [5] J. L. Purser, M. Weinberger, H. J. Cohen, C. F. Pieper, M. C. Morey, T. Li, G. R. Williams,  
443 P. Lapuerta, Walking speed predicts health status and hospital costs for frail elderly male veterans.,  
444 *Journal of rehabilitation research & development* 42 (2005).
- 445 [6] S. E. Hardy, S. Perera, Y. F. Roumani, J. M. Chandler, S. A. Studenski, Improvement in usual  
446 gait speed predicts better survival in older adults, *Journal of the American Geriatrics Society* 55  
447 (2007) 1727–1734.
- 448 [7] P. A. Goldie, T. A. Matyas, O. M. Evans, Deficit and change in gait velocity during rehabilitation  
449 after stroke, *Archives of physical medicine and rehabilitation* 77 (1996) 1074–1082.
- 450 [8] S. L. Wolf, P. A. Catlin, K. Gage, K. Gurucharri, R. Robertson, K. Stephen, Establishing the  
451 reliability and validity of measurements of walking time using the emory functional ambulation  
452 profile, *Physical Therapy* 79 (1999) 1122–1133.

- 453 [9] S. Fritz, M. Lusardi, White paper: walking speed: the sixth vital sign, *Journal of geriatric physical*  
454 *therapy* 32 (2009) 2–5.
- 455 [10] U. Dal, T. Erdogan, B. Resitoglu, H. Beydagi, Determination of preferred walking speed on  
456 treadmill may lead to high oxygen cost on treadmill walking, *Gait & posture* 31 (2010) 366–369.
- 457 [11] H. Nagano, R. K. Begg, W. A. Sparrow, S. Taylor, A comparison of treadmill and overground  
458 walking effects on step cycle asymmetry in young and older individuals, *Journal of applied biome-*  
459 *chanics* 29 (2013) 188–193.
- 460 [12] D. Malatesta, M. Canepa, A. M. Fernandez, The effect of treadmill and overground walking on  
461 preferred walking speed and gait kinematics in healthy, physically active older adults, *European*  
462 *journal of applied physiology* 117 (2017) 1833–1843.
- 463 [13] S. J. Lee, J. Hidler, Biomechanics of overground vs. treadmill walking in healthy individuals,  
464 *Journal of applied physiology* 104 (2008) 747–755.
- 465 [14] J. Zhang, P. Fiers, K. A. Witte, R. W. Jackson, K. L. Poggensee, C. G. Atkeson, S. H. Collins,  
466 Human-in-the-loop optimization of exoskeleton assistance during walking, *Science* 356 (2017)  
467 1280–1284.
- 468 [15] J. Feasel, M. C. Whitton, L. Kassler, F. P. Brooks, M. D. Lewek, The integrated virtual environ-  
469 ment rehabilitation treadmill system, *IEEE Transactions on Neural Systems and Rehabilitation*  
470 *Engineering* 19 (2011) 290–297.
- 471 [16] L. Sloop, M. Van der Krogt, J. Harlaar, Self-paced versus fixed speed treadmill walking, *Gait &*  
472 *posture* 39 (2014) 478–484.
- 473 [17] J. Yoon, H.-S. Park, D. L. Damiano, A novel walking speed estimation scheme and its application  
474 to treadmill control for gait rehabilitation, *Journal of neuroengineering and rehabilitation* 9 (2012)  
475 62.
- 476 [18] M. Plotnik, T. Azrad, M. Bondi, Y. Bahat, Y. Gimmon, G. Zeilig, R. Inzelberg, I. Siev-Ner,  
477 Self-selected gait speed-over ground versus self-paced treadmill walking, a solution for a paradox,  
478 *Journal of neuroengineering and rehabilitation* 12 (2015) 20.
- 479 [19] Grail - motekforce link, <https://www.motekmedical.com/product/grail/>, ??? Accessed: 2019-  
480 11-18.
- 481 [20] L. H. Sloop, J. Harlaar, M. M. van der Krogt, Self-paced versus fixed speed walking and the effect  
482 of virtual reality in children with cerebral palsy, *Gait & posture* 42 (2015) 498–504.
- 483 [21] M. M. van der Krogt, L. H. Sloop, A. I. Buizer, J. Harlaar, Kinetic comparison of walking on a  
484 treadmill versus over ground in children with cerebral palsy, *Journal of biomechanics* 48 (2015)  
485 3577–3583.
- 486 [22] J. Fung, C. L. Richards, F. Malouin, B. J. McFadyen, A. Lamontagne, A treadmill and motion  
487 coupled virtual reality system for gait training post-stroke, *CyberPsychology & behavior* 9 (2006)  
488 157–162.
- 489 [23] D. H. Gates, B. J. Darter, J. B. Dingwell, J. M. Wilken, Comparison of walking overground and in  
490 a computer assisted rehabilitation environment (caren) in individuals with and without transtibial  
491 amputation, *Journal of neuroengineering and rehabilitation* 9 (2012) 81.



- 492 [24] J. Kim, A. Gravunder, H.-S. Park, Commercial motion sensor based low-cost and convenient  
493 interactive treadmill, *Sensors* 15 (2015) 23667–23683.
- 494 [25] A. E. Minetti, L. Boldrini, L. Brusamolín, P. Zamparo, T. McKee, A feedback-controlled treadmill  
495 (treadmill-on-demand) and the spontaneous speed of walking and running in humans, *Journal of*  
496 *Applied Physiology* 95 (2003) 838–843.
- 497 [26] J. Von Zitzewitz, M. Bernhardt, R. Riener, A novel method for automatic treadmill speed adap-  
498 tation, *IEEE Transactions on Neural Systems and Rehabilitation Engineering* 15 (2007) 401–409.
- 499 [27] L. Sloot, M. van der Krogt, J. Harlaar, Energy exchange between subject and belt during treadmill  
500 walking, *Journal of biomechanics* 47 (2014) 1510–1513.
- 501 [28] M. Snaterse, R. Ton, A. D. Kuo, J. M. Donelan, Distinct fast and slow processes contribute to the  
502 selection of preferred step frequency during human walking, *Journal of Applied Physiology* 110  
503 (2011) 1682–1690.
- 504 [29] J. E. Graham, G. V. Ostir, Y.-F. Kuo, S. R. Fisher, K. J. Ottenbacher, Relationship between test  
505 methodology and mean velocity in timed walk tests: a review, *Archives of physical medicine and*  
506 *rehabilitation* 89 (2008) 865–872.
- 507 [30] N. Seethapathi, M. Srinivasan, The metabolic cost of changing walking speeds is significant,  
508 implies lower optimal speeds for shorter distances, and increases daily energy estimates, *Biology*  
509 *letters* 11 (2015) 20150486.
- 510 [31] B. J. Mohler, W. B. Thompson, S. H. Creem-Regehr, H. L. Pick, W. H. Warren, Visual flow  
511 influences gait transition speed and preferred walking speed, *Experimental brain research* 181  
512 (2007) 221–228.
- 513 [32] S. M. O’Connor, J. M. Donelan, Fast visual prediction and slow optimization of preferred walking  
514 speed, *Journal of neurophysiology* 107 (2012) 2549–2559.
- 515 [33] G. C. McIntosh, S. H. Brown, R. R. Rice, M. H. Thaut, Rhythmic auditory-motor facilitation  
516 of gait patterns in patients with parkinson’s disease., *Journal of Neurology, Neurosurgery &*  
517 *Psychiatry* 62 (1997) 22–26.
- 518 [34] S. A. Brinkerhoff, W. M. Murrah, Z. Hutchison, M. Miller, J. A. Roper, Words matter: Instructions  
519 dictate self-selected walking speed in young adults, *Gait & Posture* (2019).
- 520 [35] M. M. van der Krogt, L. H. Sloot, J. Harlaar, Overground versus self-paced treadmill walking in  
521 a virtual environment in children with cerebral palsy, *Gait & posture* 40 (2014) 587–593.
- 522 [36] Self-paced-treadmill repository, <https://github.com/smsong/self-paced-treadmill>, ???? Ac-  
523 cessed: 2019-11-18.
- 524 [37] W. L. Chan, T. W. Pin, Reliability, validity and minimal detectable change of 2-minute walk  
525 test, 6-minute walk test and 10-meter walk test in frail older adults with dementia, *Experimental*  
526 *gerontology* 115 (2019) 9–18.
- 527 [38] J. L. Helbostad, R. Moe-Nilssen, The effect of gait speed on lateral balance control during walking  
528 in healthy elderly, *Gait & posture* 18 (2003) 27–36.
- 529 [39] T. Fettrow, H. Reimann, D. Grenet, J. Crenshaw, J. Higginson, J. Jeka, Walking cadence affects  
530 the recruitment of the medial-lateral balance mechanisms, *bioRxiv* (2019) 658070.

- 531 [40] D. G. Hobbelen, M. Wisse, Controlling the walking speed in limit cycle walking, *The International*  
532 *Journal of Robotics Research* 27 (2008) 989–1005.
- 533 [41] V. L. Chiu, A. Voloshina, S. Collins, An ankle-foot prosthesis emulator capable of modulating  
534 center of pressure, *IEEE Transactions on Biomedical Engineering* (2019).
